# Supplementary material for: A Lipidated Single-B-Chain Derivative of Relaxin Exhibits Improved In Vitro Serum Stability without Altering Activity
Source: MDPI journal article supplement (doi:10.3390/ijms24076616), 2023-04-01
Supplement: s1 [file s1]

# SUPPORTING INFORMATION

## 1.1.1 Analytical RP-HPLC and MALDI-TOF-MS of all compounds

### 1. B7-33

RP-HPLC carried out as described in the methods using the elution gradient: buffer B 20-50% in 30 minutes,  $t_r = 17.081$  min.

MALDI-TOF-MS  $[M+H]^+$  calculated 2986.555, observed 2990.834.

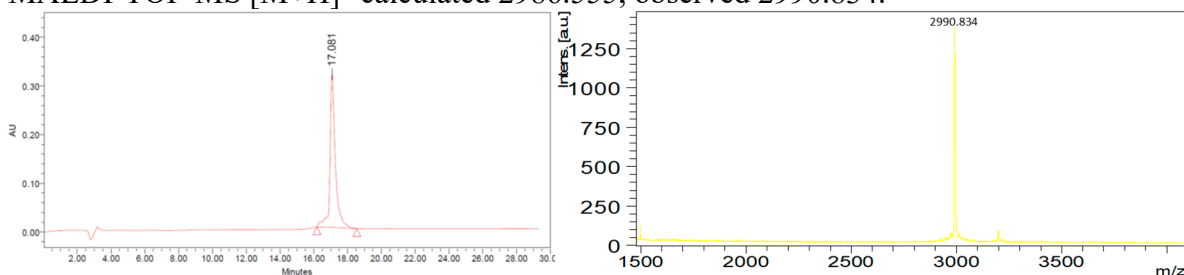

**Figure S1:** RP-HPLC profile of B7-33 (left) and MALDI-TOF-MS (right).

### 2. Decanoic acid-PEG6-B7-33

RP-HPLC carried out as described in the methods using the elution gradient: buffer B 35-65% in 30 minutes,  $t_r = 12.229$  min.

MALDI-TOF-MS  $[M+H]^+$  calculated 3475.425, observed 3481.099.

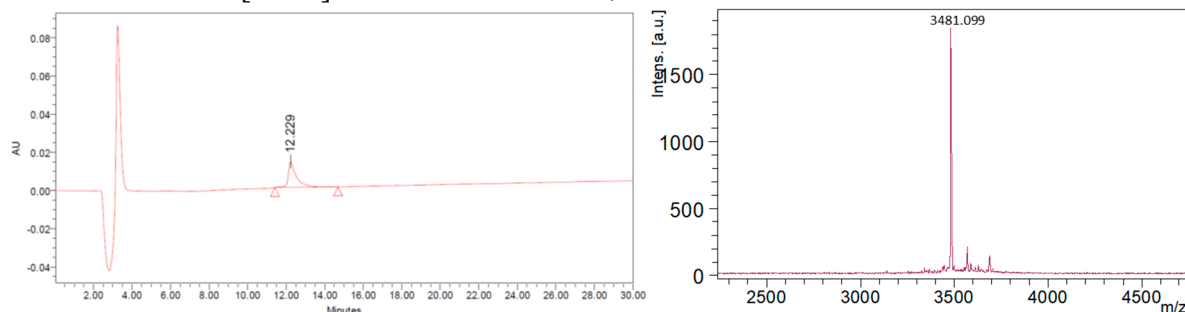

**Figure S2:** RP-HPLC profile of Decanoic acid-PEG6-B7-33 (left) and MALDI-TOF-MS (right).

### 3. Myristic acid-PEG6-B7-33

RP-HPLC carried out as described in the methods using the elution gradient: buffer B 35-65% in 30 minutes,  $t_r = 17.365$  min.

MALDI-TOF-MS  $[M+H]^+$  calculated 3532.535, observed 3536.314.

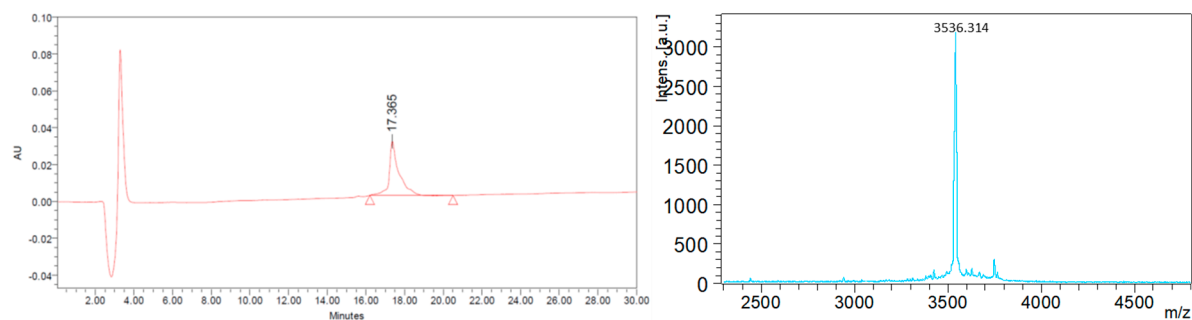

**Figure S3:** RP-HPLC profile of Myristic acid-PEG6-B7-33 (left) and MALDI-TOF-MS (right).

#### 4. Palmitic acid-PEG6-B7-33

RP-HPLC carried out as described in the methods using the elution gradient: buffer B 35-65% in 30 minutes,  $t_r = 20.330$  min.

MALDI-TOF-MS  $[M+H]^+$  calculated 3560.585, observed 3559.294.

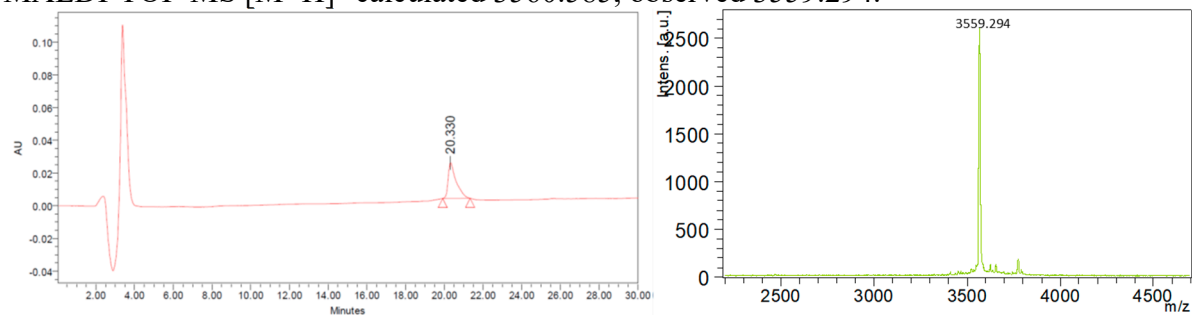

**Figure S4:** RP-HPLC profile of Palmitic acid-PEG6-B7-33 (left) and MALDI-TOF-MS (right).

#### 5. K(Palm)-PEG6-B7-33

RP-HPLC carried out as described in the methods using the elution gradient: buffer B 30-60% in 30 minutes,  $t_r = 23.823$  min.

MALDI-TOF-MS  $[M+H]^+$  calculated 3689.015, observed 3691.177.

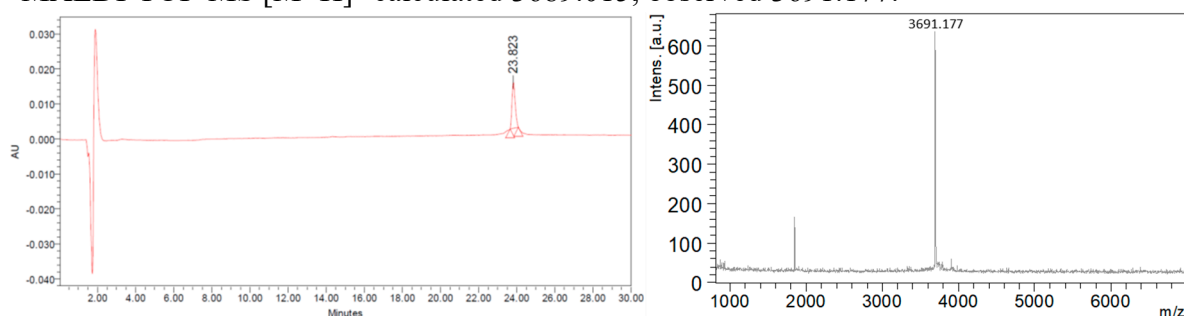

**Figure S5:** RP-HPLC profile of K(Palm)-PEG6-B7-33 (left) and MALDI-TOF-MS (right).

#### 6. B7-33\_9K(Palm)

RP-HPLC carried out as described in the methods using the elution gradient: buffer B 30-60% in 30 minutes,  $t_r = 26.347$  min.

MALDI-TOF-MS  $[M+H]^+$  calculated 3225.231, observed 3229.264.

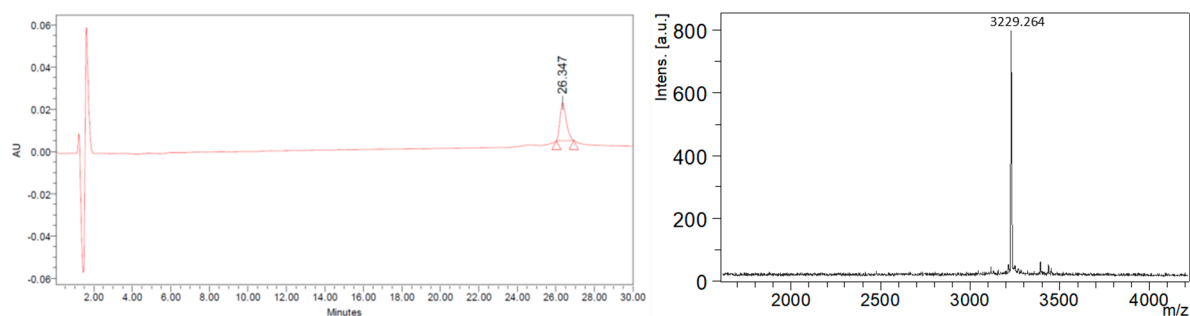

**Figure S6:** RP-HPLC profile of B7-33\_9K(Palm) (left) and MALDI-TOF-MS (right).

### 7. Tag-B7-33

RP-HPLC carried out as described in the methods using the elution gradient: buffer B 30-60% in 30 minutes,  $t_r = 27.943$  min.

MALDI-TOF-MS  $[M+H]^+$  calculated 4196.216, observed 4194.532.

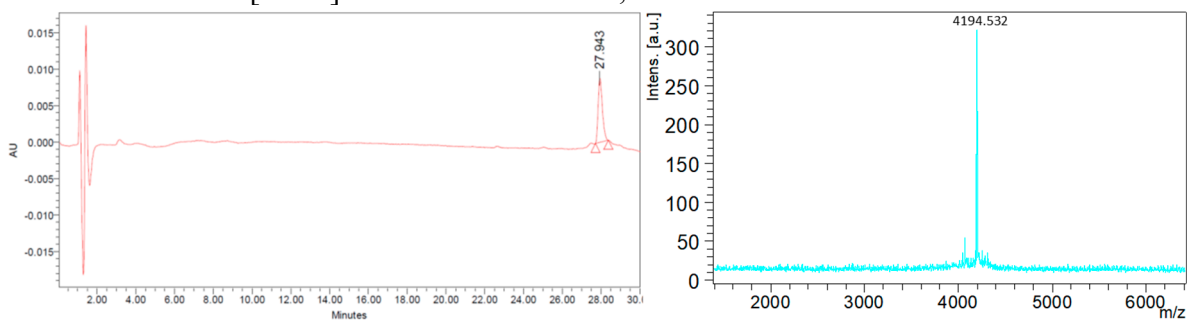

**Figure S7:** RP-HPLC profile of Tag-B7-33 (left) and MALDI-TOF-MS (right).

### 8. Tag-PEG4-B7-33

RP-HPLC carried out as described in the methods using the elution gradient: buffer B 35-65% in 30 minutes,  $t_r = 19.134$  min.

MALDI-TOF-MS  $[M+H]^+$  calculated 4443.766, observed 4440.682.

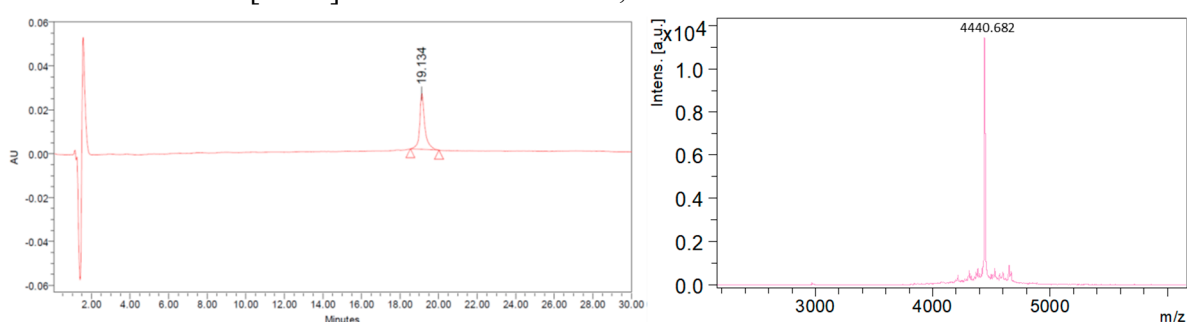

**Figure S8:** RP-HPLC profile of Tag-PEG4-B7-33 (left) and MALDI-TOF-MS (right).

### 9. Tag-PEG6-B7-33

RP-HPLC carried out as described in the methods using the elution gradient: buffer B 35-65% in 30 minutes,  $t_r = 20.079$  min.

MALDI-TOF-MS  $[M+H]^+$  calculated 4531.826, observed 4525.517.

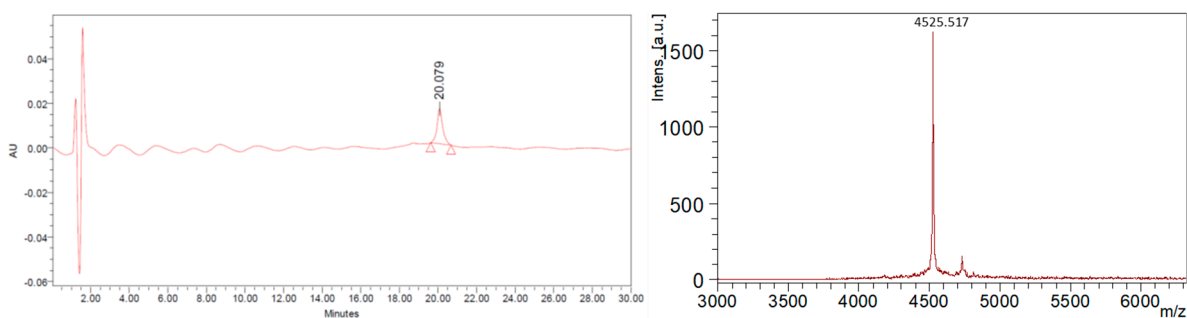

**Figure S9:** RP-HPLC profile of Tag-PEG6-B7-33 (left) and MALDI-TOF-MS (right).

### 10. K(Palm)-(PEG6)2-B7-33

RP-HPLC carried out as described in the methods using the elution gradient: buffer B 35-65% in 30 minutes,  $t_r = 17.790$  min.

MALDI-TOF-MS  $[M+H]^+$  calculated 4024.625, observed 4020.545.

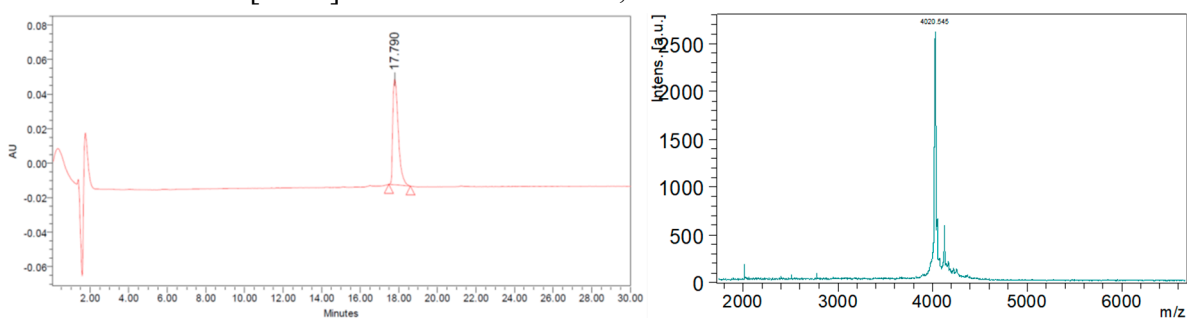

**Figure S10:** RP-HPLC profile of K(Palm)-(PEG6)2-B7-33 (left) and MALDI-TOF-MS (right).

### 11. PA-(PEG6)2-B7-33

RP-HPLC carried out as described in the methods using the elution gradient: buffer B 35-65% in 30 minutes,  $t_r = 21.220$  min.

MALDI-TOF-MS  $[M+H]^+$  calculated 3896.195, observed 3902.283.

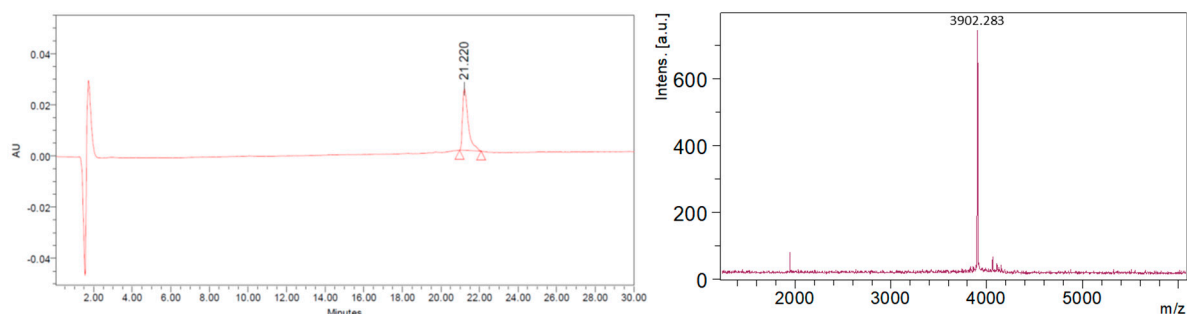

**Figure S11:** RP-HPLC profile of PA-(PEG6)2-B7-33 (left) and MALDI-TOF-MS (right).

### 12. K(Palm)-PEG12-B7-33

RP-HPLC was carried out as described in the methods using the elution gradient: buffer B 30-60% in 30 minutes,  $t_r = 21.965$  min.

MALDI-TOF-MS  $[M+H]^+$  calculated 3953.365, observed 3953.897.

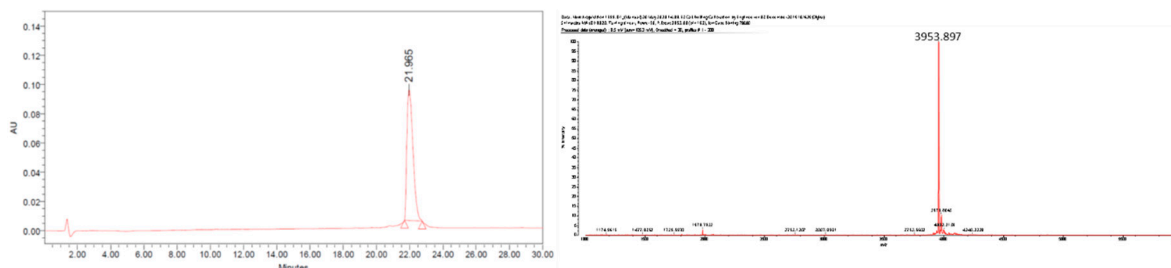

**Figure S12:** RP-HPLC profile of K(Palm)-PEG12-B7-33 (left) and MALDI-TOF-MS (right).

### 13. K(PalmGlu)-PEG12-B7-33

RP-HPLC carried out as described in the methods using the elution gradient: buffer B 30-60% in 30 minutes,  $t_r = 23.073$  min.

MALDI-TOF-MS  $[M+H]^+$  calculated 4082.506, observed 4080.542.

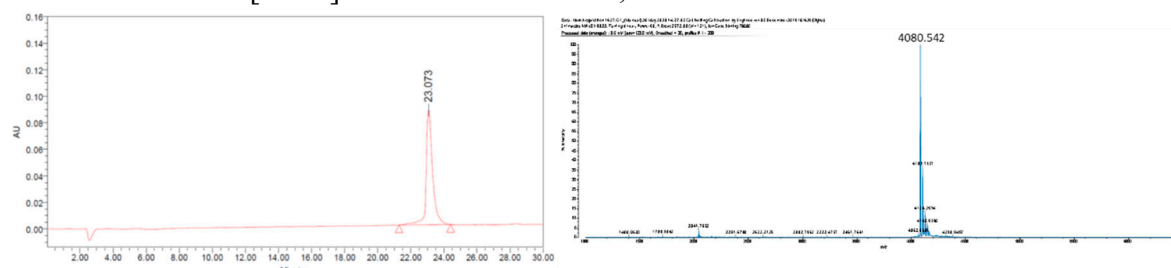

**Figure S13:** RP-HPLC profile of K(PalmGlu)-PEG12-B7-33 (left) and MALDI-TOF-MS (right).

### 14. AcK(PalmGlu)-PEG12-B7-33

RP-HPLC carried out as described in the methods chapter 2 using the elution gradient: buffer B 35-65% in 30 minutes,  $t_r = 19.392$  min.

MALDI-TOF-MS  $[M+H]^+$  calculated 4124.517, observed 4125.935.

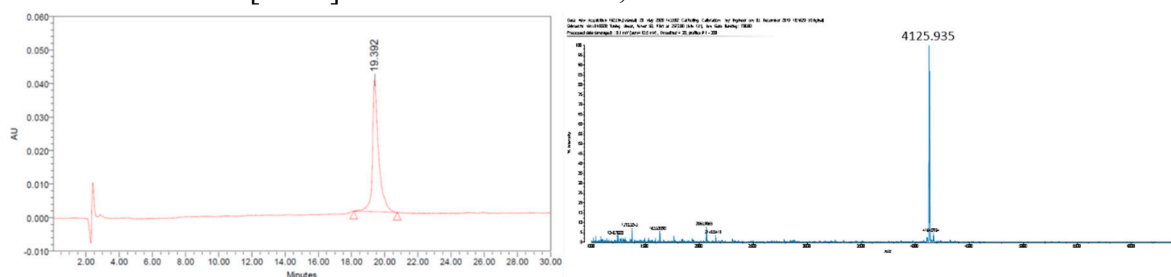

**Figure S14:** RP-HPLC profile of AcK(PalmGlu)-PEG12-B7-33 (left) and MALDI-TOF-MS (right).

**Table S1:** Summary of peptide characterization by MALDI-TOF MS and HPLC

| Analogues                | MALDI TOF MS |            | HPLC                 | Purity (%) | Yield (%) |
|--------------------------|--------------|------------|----------------------|------------|-----------|
|                          | Observed*    | Calculated | t <sub>R</sub> (min) |            |           |
| B7-33                    | 2990.834     | 2986.555   | 17.081               | 99.09      | 55        |
| Decanoic acid-PEG6-B7-33 | 3481.099     | 3475.425   | 12.229               | 100        | 50        |
| Myristic acid-PEG6-B7-33 | 3536.314     | 3532.535   | 17.365               | 99.57      | 45        |
| Palmitic acid-PEG6-B7-33 | 3559.294     | 3560.585   | 20.33                | 99.92      | 40        |
| K(Palm)-PEG6-B7-33       | 3691.177     | 3689.015   | 23.823               | 100        | 45        |
| B7-33_9K(Palm)           | 3229.264     | 3225.231   | 26.347               | 97.34      | 25        |
| Tag-B7-33                | 4194.532     | 4196.216   | 27.943               | 97.68      | 25        |
| Tag-PEG4-B7-33           | 4440.682     | 4443.766   | 19.134               | 99.7       | 33        |
| Tag-PEG4-B7-33           | 4525.517     | 4531.826   | 20.079               | 99.69      | 30        |
| K(Palm)-(PEG6)2-B7-33    | 4020.545     | 4024.625   | 17.790               | 99.68      | 55        |
| PA-(PEG6)2-B7-33         | 3902.283     | 3896.195   | 21.22                | 99.69      | 35        |
| K(Palm)-PEG12-B7-33      | 3953.897     | 3953.365   | 21.965               | 99.94      | 42        |
| K(PalmGlu)-PEG12-B7-33   | 4080.542     | 4082.506   | 23.073               | 99.72      | 45        |
| AcK(PalmGlu)-PEG12-B7-33 | 4125.935     | 4124.517   | 19.392               | 100        | 45        |

\* Observed molecular weights were determined by MALDI-TOF MS of the purified peptides
